# Supplementary material for: Interactive Two-Way mHealth Interventions for Improving Medication Adherence: An Evaluation Using The Behaviour Change Wheel Framework
Source: JMIR Mhealth Uhealth. 2018 Apr 12;6(4):e87. doi: 10.2196/mhealth.9187 (PMC5920150; doi:10.2196/mhealth.9187)
Supplement: Multimedia Appendix 3 [file mhealth_v6i4e87_app3.pdf]

| (1) Automated text message component<br>(2)(3)(4) Personalized communication component                                                                                                                                                                     |                                                                                                                                                                                                                                                                                                                                                                                                                                                                                                    | CAPABILITY                           |                       | OPPORTUNITY                          |                            | MOTIVATION                      |                                           |
|------------------------------------------------------------------------------------------------------------------------------------------------------------------------------------------------------------------------------------------------------------|----------------------------------------------------------------------------------------------------------------------------------------------------------------------------------------------------------------------------------------------------------------------------------------------------------------------------------------------------------------------------------------------------------------------------------------------------------------------------------------------------|--------------------------------------|-----------------------|--------------------------------------|----------------------------|---------------------------------|-------------------------------------------|
| Text description of intervention (from WelTel user manual)                                                                                                                                                                                                 | Identified BCT <sup>a</sup><br><hr/> Intervention Function (refer to <i>Multimedia Appendix 1</i> for individual definitions)                                                                                                                                                                                                                                                                                                                                                                      | P<br>H<br>Y<br>S<br>I<br>C<br>A<br>L | P<br>S<br>Y<br>C<br>H | P<br>H<br>Y<br>S<br>I<br>C<br>A<br>L | S<br>O<br>C<br>I<br>A<br>L | R<br>E<br>F<br>L<br>E<br>C<br>T | A<br>U<br>T<br>O<br>M<br>A<br>T<br>I<br>C |
| (1) “Patients received weekly message saying ‘Mambo’ (how are you?), must reply ‘Sawa’ (fine) or ‘Shida’ (not fine)”                                                                                                                                       | 7.1 (prompts/cues): “Introduce or define environmental or social stimulus with the purpose of prompting or cueing the behavior”<br><hr/> Environmental restructuring                                                                                                                                                                                                                                                                                                                               |                                      |                       | ✓                                    |                            |                                 | ✓                                         |
| (2) “The clinician then called patients who said they had a problem or who failed to respond within 2 days.”                                                                                                                                               | 3.1 (social support - unspecified): “Advise on, arrange or provide social support or non-contingent praise or reward for performance of the behavior. It includes encouragement and counselling, but only when it is directed at the behavior”<br>7.1 (prompts/cues): “Introduce or define environmental or social stimulus with the purpose of prompting or cueing the behavior”<br><hr/> Enablement, Environmental restructuring                                                                 |                                      |                       | ✓                                    | ✓                          |                                 | ✓                                         |
| (3) “The clinician appropriately provides patient with personalized support, such as addressing stigma around HIV/AIDS, provision of education relating to the importance of adhering to treatment, and the consequences of not engaging in this behavior” | 11.2 (reduce negative emotions): “Advise on ways of reducing negative emotions to facilitate performance of the behavior”<br>9.1 (credible source): “Present verbal or visual communication from a credible source in favour of or against the behavior”<br>5.1 (natural consequences): “Information about health consequences”<br>3.3 (social support - emotional): “Advise on, arrange, or provide emotional support for performance of the behavior”<br><hr/> Education, Persuasion, Enablement |                                      | ✓                     | ✓                                    | ✓                          | ✓                               | ✓                                         |
| (4) “The clinician may help to clarify patient ART dosing regimen upon confusion, as well as how to manage adverse effects”                                                                                                                                | 3.2 (social support - practical): “Advise on, arrange, or provide practical help for performance of the behavior”<br>4.1 (instruction on how to perform a behavior): “Advise or agree on how to perform the behavior”<br><hr/> Training, Enablement                                                                                                                                                                                                                                                | ✓                                    | ✓                     | ✓                                    | ✓                          |                                 | ✓                                         |
